# Supplementary material
Source: publisher figshare collection journal article supplement (https://springernature.figshare.com/ndownloader/files/7193327)
Supplement: Supplementary file [file 7193327]

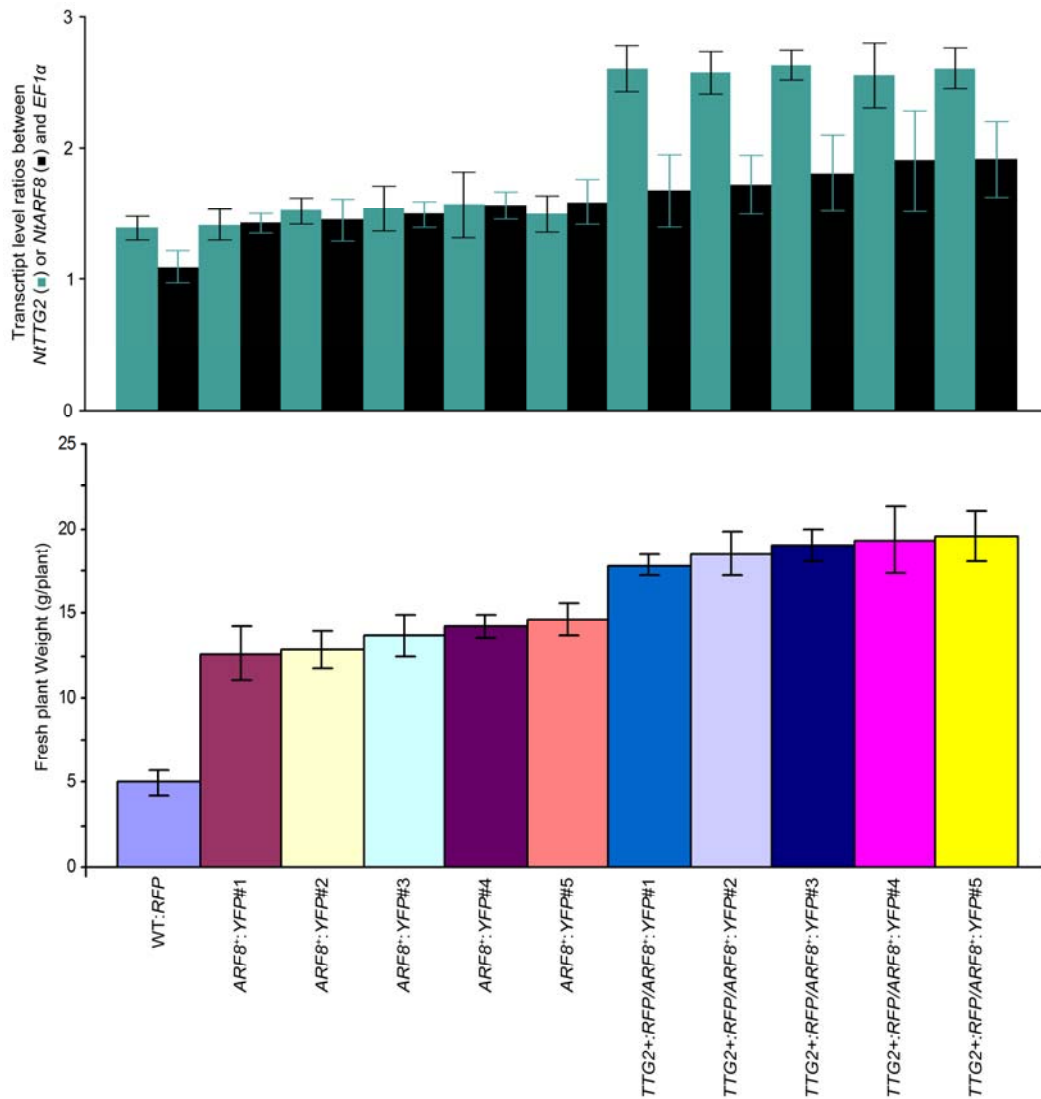

**Additional File 5: Figure S4 The effects of *NtARF8* and *NtTTG2* overexpression on plant growth.** Gene expression analyses were performed on the top sixth leaves of 30-day-old plants and fresh weight of 50-day-old plants was determined. The bar graphs represent means  $\pm$  SEMs of replicate results ( $n = 3$  experimental replicates).
